# Supplementary material
Source: PubMed Central journal article supplement (PMC2710926)
Supplement: blood-2008-10-186601_1.pdf [file blood-2008-10-186601_1.pdf]

| <b>HLA</b> | <b>Epitope</b> | <b>Protein</b> | <b>Virus</b> | <b>Source</b>     |
|------------|----------------|----------------|--------------|-------------------|
| A2         | NLVPMVATV      | pp65           | CMV          | NIH Tetramer Core |
| A2         | GLCTLVAML      | BMLF1          | EBV          | Beckman Coulter   |
| A2         | GILGFVFTL      | MP58           | FLU          | NIH Tetramer Core |
| A2         | ILKEPVHGV      | Pol            | HIV          | NIH Tetramer Core |
| A2         | SLYNTVATL      | p17            | HIV          | NIH Tetramer Core |
| A3         | RVRAYTYSK      | BRLF1          | EBV          | NIH Tetramer Core |
| A3         | ILRGSVAHK      |                | Flu          | NIH Tetramer Core |
| A3         | RLRPGGKKK      | p17            | HIV          | NIH Tetramer Core |
| A3         | QVPLRPMTYK     | nef            | HIV          | NIH Tetramer Core |
| A3         | AIFQSSMTK      | RT             | HIV          | NIH Tetramer Core |
| A3         | RMRGAHTNKVK    | RT             | HIV          | NIH Tetramer Core |
| B7         | RPPIFIRRL      |                | EBV          | NIH Tetramer Core |
| B7         | HPVAHGPIA      | p24            | HIV          | NIH Tetramer Core |
| B7         | TPRVTGGGAM     | pp65           | CMV          | Beckman Coulter   |
