# Supplementary material
Source: PubMed Central journal article supplement (PMC2710926)
Supplement: blood-2008-10-186601_2.pdf [file blood-2008-10-186601_2.pdf]

**Stratum 1 (RNA < 50): 17 subjects**

Dose 1 (3 micrograms/kg): 4 subjects (3 active, 1 placebo)

Dose 2 (10 micrograms/kg): 4 subjects (3 active, 1 placebo)

Dose 3 (30 micrograms/kg): 5 subjects\* (4 active, 1 placebo)

Dose 4 (60 micrograms/kg): 4 subjects (3 active, 1 placebo)

**Stratum 2 (RNA: 50-50,000): 8 subjects**

Dose 1 (3 micrograms/kg): 4 subjects (3 active, 1 placebo)

Dose 2 (10 micrograms/kg): 4 subjects (3 active, 1 placebo)

\*One subject was excluded from all analyses (except safety) because of missing critical laboratory data.
