# Supplementary material
Source: PubMed Central journal article supplement (PMC2710926)
Supplement: blood-2008-10-186601_3.pdf [file blood-2008-10-186601_3.pdf]

|                           | Placebo (N=6) |          | IL7 3µg/kg (N=6) |          | IL7 10 µg/kg (N=6) |                | IL7 30 µg/kg (N=3) |          | IL7 60 µg/kg (N=3) |                |
|---------------------------|---------------|----------|------------------|----------|--------------------|----------------|--------------------|----------|--------------------|----------------|
| Toxicities/Toxicity Grade | <b>2</b>      | <b>3</b> | <b>2</b>         | <b>3</b> | <b>2</b>           | <b>3</b>       | <b>2</b>           | <b>3</b> | <b>2</b>           | <b>3</b>       |
| General Body              | 1             |          | 1                |          | 1                  |                | 1                  |          | 1                  |                |
| Respiratory               |               |          |                  |          |                    |                | 1                  |          | 1                  |                |
| Endocrine                 | 1             |          |                  |          |                    |                |                    |          |                    |                |
| Metabolic                 | 1             |          | 1                |          | 1                  |                | 1                  |          | 1                  |                |
| Liver/Hepatic             |               |          | 1                |          | 1                  | 1 <sup>A</sup> |                    |          |                    | 1 <sup>B</sup> |
| Gastrointestinal          |               |          |                  |          | 1                  |                |                    |          | 1                  |                |
| Skin                      |               |          |                  |          |                    |                |                    |          |                    | 1 <sup>C</sup> |
| Neurological              |               |          | 1                |          | 1                  |                |                    |          | 1                  |                |
| Any toxicity*             | 3             | 0        | 2                | 0        | 1                  | 1              | 2                  | 0        | 1                  | 2              |

A. Elevated total bilirubin in atazanavir recipient (at week 1; classified as not related to study treatment)

B. Elevated Alanine Aminotransferase (ALT), elevated gamma glutamyl transpeptidase (GGTP), SGPT (all at week 1; classified as possibly/probably and possibly, to study treatment respectively)

C. Induration; induration at the site of injection (at week 1; classified as definitely related to study treatment)

\* NOTE: This represents the distinct number of subjects who reported ANY toxicity. A subject may report multiple toxicities but the subject was only counted once in the “Any toxicity” category.
